# Supplementary material for: Dual Graph Partitioning Highlights a Small Group of Pseudoknot-Containing RNA Submotifs
Source: MDPI journal article supplement (doi:10.3390/genes9080371), 2018-07-25
Supplement: s1 [file s1]

## The Schlick lab RNA-As-Graphs Dual Graph Resource

Our dual graph resource (available at: [http://www.biomath.nyu.edu/?q=rag/dual\\_vertices.php](http://www.biomath.nyu.edu/?q=rag/dual_vertices.php)) consists of two parts as shown in Figure 1:

The first part lists the 94 dual graph topologies between 2-9 vertices that correspond to existing RNA structures in the representative RNA dataset. All existing dual graph topologies are shown on the corresponding vertex page. For example, Figure 2 shows the 6 existing dual graph topologies with 3 vertices. RNA structures and chains from the representative dataset corresponding to each existing dual graph topology are also listed. For example, Figure 3 shows the list of 8 RNA PDB files and chains that correspond to the dual graph topology 3\_2.

The second part contains the link to download the *RAG-3Dual database* (as a single zipped file), that contains the non-separable subgraph blocks and corresponding RNA atomic fragments. These non-separable blocks are obtained by applying dual graph partitioning to the 2D structures in the representative RNA dataset ( $\geq 2$  vertices). The atomic fragments are cataloged based on their dual graph IDs.

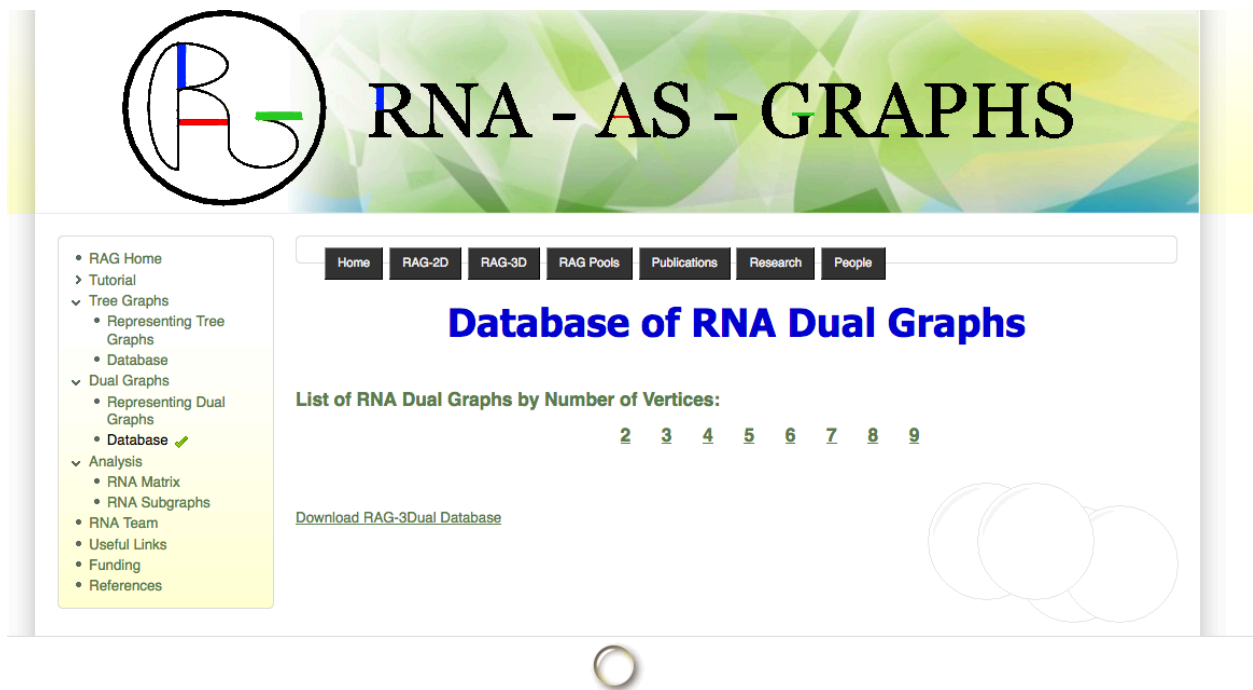

Figure 1: Two parts of our dual graph resource.

- RAG Home
- Tutorial
- Tree Graphs
  - Representing Tree Graphs
  - Database
- Dual Graphs
  - Representing Dual Graphs
  - Database ✓
- Analysis
  - RNA Matrix
  - RNA Subgraphs
- RNA Team
- Useful Links
- Funding
- References

Home RAG-2D RAG-3D RAG Pools Publications Research People

## Database of RNA Dual Graphs

### List of RNA Dual Graphs by Number of Vertices:

[2](#) [3](#) [4](#) [5](#) [6](#) [7](#) [8](#) [9](#)

[Download RAG-3Dual Database](#)

### 3 VERTICES

Number of Possible RNA Topologies: 8  
Number of Motifs Found: 6  
Number of Missing Motifs: 2

To learn more about an RNA topology, please click on its graph.

These graphs have been ordered according to the second smallest eigenvalue of their Laplacian matrix ( $\lambda_2$  is given).

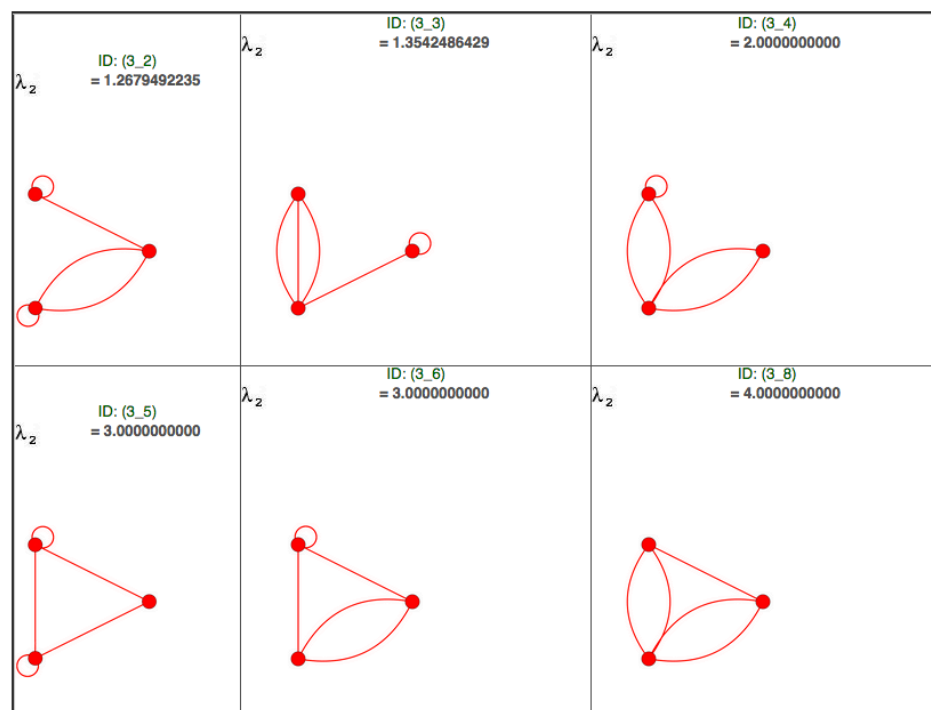

Figure 2: The 6 existing dual graph topologies with 3 vertices.

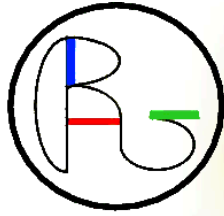

# RNA - AS - GRAPHS

- RAG Home
- Tutorial
- Tree Graphs
  - Representing Tree Graphs
  - Database
- Dual Graphs
  - Representing Dual Graphs
  - Database
- Analysis
  - RNA Matrix
  - RNA Subgraphs
- RNA Team
- Useful Links
- Funding
- References

[Home](#)
[RAG-2D](#)
[RAG-3D](#)
[RAG Pools](#)
[Publications](#)
[Research](#)
[People](#)

## Dual Topology: 3\_2

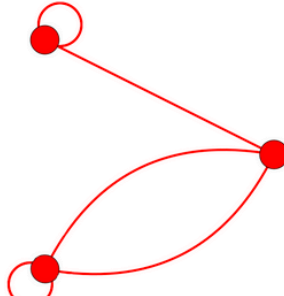

### Topological Aspects

- 3 Vertices

- Eigenvalues
- 0.0000000000
- 1.2679492235
- 4.7320508957

Examples of actual RNAs corresponding to this structure from RNA databases: 8

| PDB_Chain | Type                                      | Discovery Method    |
|-----------|-------------------------------------------|---------------------|
| 1M5K_E    | RNA HAIRPIN RIBOZYME                      | X-RAY DIFFRACTION   |
| 3IZZ_A    | Helix 5, 14, 15 (Small Subunit)           | ELECTRON MICROSCOPY |
| 3J0D_A    | ribosomal 23S RNA                         | ELECTRON MICROSCOPY |
| 3JCT_6    | ITS2-1 miscRNA                            | ELECTRON MICROSCOPY |
| 4PKD_V    | U1 snRNA stem-loops 1 and 2 (55-MER)      | X-RAY DIFFRACTION   |
| 4WZJ_YYYY | U4 small nuclear RNA variant              | X-RAY DIFFRACTION   |
| 5CZZ_B    | RNA (73-MER)                              | X-RAY DIFFRACTION   |
| 5WSG_E    | Saccharomyces cerevisiae S288c SNR6 snRNA | ELECTRON MICROSCOPY |

Figure 3: List of RNA PDB files and chains corresponding to the existing dual graph topology 3\_2.
