# Supplementary material for: Dual Graph Partitioning Highlights a Small Group of Pseudoknot-Containing RNA Submotifs
Source: MDPI journal article supplement (doi:10.3390/genes9080371), 2018-07-25
Supplement: s1 [file s1]

# Supplementary Data for Dual Graph Partitioning Highlights a Small Group of Pseudoknot-Containing RNA Submotifs

Swati Jain<sup>1</sup>, Cigdem Sevim Bayrak<sup>1</sup>, Louis Petingi<sup>2</sup>, and Tamar Schlick<sup>1,3,4,\*</sup>

<sup>1</sup>Department of Chemistry, New York University, New York, NY, USA

<sup>2</sup>Computer Science Department, College of Staten Island, City University of New York, New York, NY, USA

<sup>3</sup>Courant Institute of Mathematical Sciences, New York University, New York, NY, USA

<sup>4</sup>NYU-ECNU Center for Computational Chemistry at NYU Shanghai, Shanghai, China

\*Corresponding author: schlick@nyu.edu

Table S1: 94 dual graph topologies between 2-9 vertices, with IDs and number of structures, for the representative RNA structure dataset

| RAG ID | Structures | Topology                                                                            | RAG ID | Structures | Topology                                                                              |
|--------|------------|-------------------------------------------------------------------------------------|--------|------------|---------------------------------------------------------------------------------------|
| 2_1    | 6          | 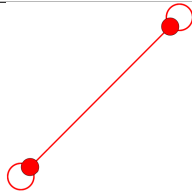 | 2_2    | 269        |  |
| 2_3    | 32         |  | 3_2    | 8          |  |
| 3_3    | 1          |  | 3_4    | 68         |  |
| 3_5    | 23         |  | 3_6    | 7          |  |

|      |    |                                                                                     |      |     |                                                                                       |
|------|----|-------------------------------------------------------------------------------------|------|-----|---------------------------------------------------------------------------------------|
| 3_8  | 11 | 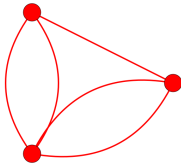   | 4_1  | 3   |    |
| 4_2  | 2  |    | 4_4  | 2   |    |
| 4_5  | 1  |    | 4_8  | 3   |    |
| 4_9  | 1  |   | 4_10 | 1   |   |
| 4_12 | 5  |  | 4_14 | 21  |  |
| 4_16 | 16 |  | 4_19 | 105 |  |
| 4_20 | 1  |  | 4_21 | 1   |  |

|      |    |                                                                                     |      |    |                                                                                       |
|------|----|-------------------------------------------------------------------------------------|------|----|---------------------------------------------------------------------------------------|
| 4_25 | 5  | 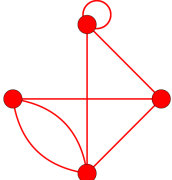   | 4_27 | 14 |    |
| 4_29 | 1  |    | 4_30 | 1  |    |
| 5_2  | 15 |    | 5_4  | 1  |    |
| 5_6  | 3  |   | 5_9  | 1  |   |
| 5_11 | 1  |  | 5_20 | 2  |  |
| 5_21 | 3  |  | 5_32 | 12 |  |
| 5_35 | 1  |  | 5_45 | 1  |  |

|       |   |                                                                                     |       |    |                                                                                       |
|-------|---|-------------------------------------------------------------------------------------|-------|----|---------------------------------------------------------------------------------------|
| 5_46  | 1 | 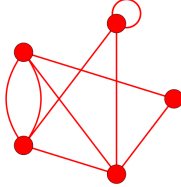   | 5_48  | 1  |    |
| 5_52  | 2 |    | 5_62  | 6  |    |
| 5_64  | 1 |    | 5_68  | 1  |    |
| 5_94  | 1 |   | 5_96  | 10 |   |
| 6_36  | 1 |  | 6_57  | 1  |  |
| 6_70  | 1 |  | 6_91  | 2  |  |
| 6_101 | 1 |  | 6_109 | 1  |  |

|       |   |                                                                                     |       |    |                                                                                       |
|-------|---|-------------------------------------------------------------------------------------|-------|----|---------------------------------------------------------------------------------------|
| 6_198 | 1 | 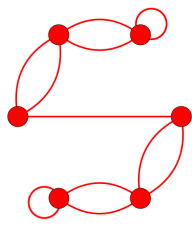   | 6_226 | 1  |    |
| 6_235 | 1 |    | 6_236 | 1  |    |
| 6_257 | 2 |    | 6_263 | 13 |    |
| 6_281 | 1 |   | 6_303 | 1  |   |
| 6_311 | 1 |  | 6_372 | 2  |  |
| 6_460 | 2 |  | 7_222 | 1  |  |
| 7_729 | 2 |  | 7_934 | 1  |  |

|        |   |                                                                                     |        |   |                                                                                       |
|--------|---|-------------------------------------------------------------------------------------|--------|---|---------------------------------------------------------------------------------------|
| 7_1082 | 1 | 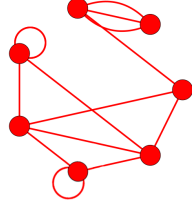   | 7_1091 | 1 |    |
| 7_1119 | 2 |    | 7_1141 | 1 |    |
| 7_1219 | 1 |    | 7_1235 | 1 |    |
| 7_1311 | 8 |    | 7_1329 | 1 |    |
| 7_1341 | 2 |  | 7_1714 | 3 |  |
| 7_1928 | 1 |  | 7_1949 | 1 |  |
| 7_2019 | 4 |  | 7_2244 | 1 |  |
| 7_2329 | 1 |  | 8_721  | 1 |  |

|         |   |                                                                                     |         |   |                                                                                       |
|---------|---|-------------------------------------------------------------------------------------|---------|---|---------------------------------------------------------------------------------------|
| 8_5491  | 2 | 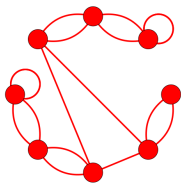   | 8_7748  | 1 |    |
| 8_8221  | 1 |    | 8_9902  | 1 |    |
| 8_10647 | 1 |    | 9_18405 | 1 |    |
| 9_19203 | 1 |   | 9_20569 | 1 |   |
| 9_20790 | 1 |  | 9_35189 | 1 |  |
| 9_38596 | 1 |  | 9_38597 | 3 |  |
| 9_38598 | 1 |  | 9_38599 | 1 |  |

Table S2: Number of structures in the representative dataset that have dual graphs with  $\geq 10$  vertices

| Vertices | Structures | Vertices | Structures | Vertices | Structures | Vertices | Structures |
|----------|------------|----------|------------|----------|------------|----------|------------|
| 10       | 9          | 11       | 4          | 12       | 2          | 13       | 6          |
| 14       | 5          | 15       | 3          | 17       | 2          | 18       | 1          |
| 20       | 1          | 23       | 1          | 24       | 1          | 29       | 1          |
| 31       | 1          | 38       | 1          | 48       | 1          | 50       | 1          |
| 54       | 1          | 55       | 1          | 56       | 1          | 61       | 1          |
| 71       | 1          | 72       | 1          | 75       | 1          | 76       | 2          |
| 77       | 3          | 78       | 2          | 79       | 2          | 80       | 2          |
| 81       | 1          | 83       | 2          | 84       | 1          | 85       | 1          |
| 86       | 1          | 87       | 6          | 88       | 1          | 90       | 1          |
| 96       | 2          | 98       | 2          | 100      | 4          | 101      | 1          |
| 128      | 1          | 141      | 1          | 145      | 1          | 147      | 1          |
| 151      | 1          | 156      | 1          | 157      | 2          | 158      | 3          |
| 161      | 1          | 162      | 1          | 163      | 2          | 166      | 1          |
| 169      | 1          | 171      | 1          | 174      | 3          | 176      | 1          |
| 184      | 1          | 186      | 1          | 187      | 1          | 192      | 1          |
| 199      | 1          |          |            |          |            |          |            |



Table S3: Dual graph topologies that were removed from the updated library of existing dual graph topologies due to reasons as listed.

| Topology | Reason for removal                                                  |
|----------|---------------------------------------------------------------------|
| 3_1      | Duplicate chains (e.g., PDB ID: 1Q96) and SRP database              |
| 3_7      | Pseudobase++ database                                               |
| 4_15     | Rfam database                                                       |
| 4_17     | Pseudobase++ database                                               |
| 4_22     | Rfam database and Pseudobase++ database                             |
| 4_28     | Pseudobase++ database                                               |
| 5_10     | Rfam database                                                       |
| 5_22     | Pseudobase++ database                                               |
| 5_25     | Pseudobase++ database                                               |
| 5_38     | Pseudobase++ database                                               |
| 5_39     | Pseudobase++ database                                               |
| 5_41     | Pseudobase++ database                                               |
| 5_43     | Duplicate chains (e.g., PDB ID: 1ML5)                               |
| 5_51     | Pseudobase++ database                                               |
| 5_55     | Pseudobase++ database                                               |
| 5_70     | Pseudobase++ database                                               |
| 5_77     | Pseudobase++ database                                               |
| 5_91     | Non-canonical base pair considered (e.g., PDB ID: 1SER)             |
| 6_1      | Duplicate chains (e.g., PDB ID: 2DEU)                               |
| 6_7      | Duplicate chains (e.g., PDB ID: 1MME)                               |
| 6_42     | Duplicate chains (e.g., PDB ID: 1J2B) and Rfam database             |
| 6_66     | Pseudobase++ database                                               |
| 6_78     | Larger structure in the representative dataset (e.g., PDB ID: 2R8S) |
| 6_80     | Pseudobase++ database                                               |
| 6_127    | Pseudobase++ database                                               |
| 6_149    | Rfam database                                                       |
| 7_74     | Duplicate chains (e.g., PDB ID: 1UN6)                               |
| 7_137    | Chains separated in the representative dataset (e.g., PDB ID: 1YSH) |
| 7_513    | Pseudobase++ database                                               |
| 7_2314   | SRP database                                                        |
| 7_2315   | Pseudobase++ database                                               |
| 8_1199   | Duplicate chains (e.g., PDB ID: 1ZHO)                               |
| 8_2314   | Chains separated in the representative dataset (e.g., PDB ID: 2GCV) |
| 9_20589  | SRP database                                                        |
| 9_28291  | Duplicate chains (e.g., PDB ID: 406D)                               |
| 9_30950  | SRP database                                                        |
| 9_38133  | SRP database                                                        |

Table S4: Number of subgraph blocks  $\geq 10$  vertices identified by the dual graph partitioning algorithm in the representative dataset of RNA structures

| No. of<br>vertices | No. of<br>occurrences |
|--------------------|-----------------------|
| 11                 | 7                     |
| 12                 | 3                     |
| 17                 | 1                     |
| 21                 | 1                     |
| 23                 | 1                     |
| 37                 | 1                     |
| 39                 | 1                     |
| 40                 | 1                     |
| 41                 | 5                     |
| 42                 | 2                     |
| 43                 | 2                     |
| 44                 | 2                     |
| 46                 | 1                     |
| 47                 | 1                     |
| 67                 | 1                     |
| 68                 | 3                     |
| 70                 | 4                     |
| 71                 | 1                     |
| 72                 | 2                     |
| 73                 | 1                     |
| 75                 | 1                     |
| 76                 | 5                     |
| 90                 | 1                     |

Table S5: PDB IDs and chains for rRNAs of small ribosomal subunits for 10 prokaryotic and 12 eukaryotic species

| PDB ID      | Chain | Species                              | Organism | rRNA |
|-------------|-------|--------------------------------------|----------|------|
| Prokaryotes |       |                                      |          |      |
| 4V4N        | B2    | <i>Methanocaldococcus jannaschii</i> | Archae   | 16S  |
| 5JB3        | 2     | <i>Pyrococcus abyssi</i>             | Archae   | 16S  |
| 4V6U        | A2    | <i>Pyrococcus furiosus</i>           | Archae   | 16S  |
| 3J9W        | AA    | <i>Bacillus subtilis</i>             | Bacteria | 16S  |
| 4V4Q        | CA    | <i>Escherichia coli</i>              | Bacteria | 16S  |
| 5MYJ        | AA    | <i>Lactococcus lactis</i>            | Bacteria | 16S  |
| 5O61        | BA    | <i>Mycobacterium smegmatis</i>       | Bacteria | 16S  |
| 5V93        | a     | <i>Mycobacterium tuberculosis</i>    | Bacteria | 16S  |
| 5ND8        | a     | <i>Staphylococcus aureus</i>         | Bacteria | 16S  |
| 1FJG        | A     | <i>Thermus thermophilus</i>          | Bacteria | 16S  |
| Eukaryotes  |       |                                      |          |      |
| 3JBN        | A     | <i>Plasmodium falciparum</i>         | Protozoa | 18S  |
| 4BTS        | DA    | <i>Tetrahymena thermophila</i>       | Protozoa | 18S  |
| 5XYI        | 2     | <i>Trichomonas vaginalis</i>         | Protozoa | 18S  |
| 4V7H        | AA    | <i>Thermomyces lanuginosus</i>       | Fungi    | 18S  |
| 3JAM        | 2     | <i>Kluyveromyces lactis</i>          | Yeast    | 18S  |
| 4UER        | A     | <i>Lachancea kluyveri</i>            | Yeast    | 18S  |
| 4V88        | A6    | <i>Saccharomyces cerevisiae</i>      | Yeast    | 18S  |
| 4V7E        | Ad    | <i>Triticum aestivum</i>             | Plant    | 18S  |
| 4V6W        | B2    | <i>Drosophila melanogaster</i>       | Fly      | 18S  |
| 5VYC        | i4    | <i>Homo sapiens</i>                  | Mammal   | 18S  |
| 4KZY        | i     | <i>Oryctolagus cuniculus</i>         | Mammal   | 18S  |
| 3J7P        | S2    | <i>Sus scrofa</i>                    | Mammal   | 18S  |

Table S6: PDB IDs and chains for rRNAs of large ribosomal subunits for 11 prokaryotic and 11 eukaryotic species

| PDB ID      | Chain | Species                              | Organism | rRNA     |
|-------------|-------|--------------------------------------|----------|----------|
| Prokaryotes |       |                                      |          |          |
| 4V9F        | 0     | <i>Haloarcula marismortui</i>        | Archae   | 23S      |
| 4V4N        | A1    | <i>Methanocaldococcus jannaschii</i> | Archae   | 23S      |
| 4V6U        | B1    | <i>Pyrococcus furiosus</i>           | Archae   | 23S      |
| 3J9W        | BA    | <i>Bacillus subtilis</i>             | Bacteria | 23S      |
| 4IOA        | X     | <i>Deinococcus radiodurans</i>       | Bacteria | 23S      |
| 5J7L        | DA    | <i>Escherichia coli</i>              | Bacteria | 23S      |
| 5MYJ        | BA    | <i>Lactococcus lactis</i>            | Bacteria | 23S      |
| 5O60        | A     | <i>Mycobacterium smegmatis</i>       | Bacteria | 23S      |
| 5V7Q        | A     | <i>Mycobacterium tuberculosis</i>    | Bacteria | 23S      |
| 5HL7        | X     | <i>Staphylococcus aureus</i>         | Bacteria | 23S      |
| 5FDU        | 1A    | <i>Thermus thermophilus</i>          | Bacteria | 23S      |
| Eukaryotes  |       |                                      |          |          |
| 3J79        | AC    | <i>Plasmodium falciparum</i>         | Protozoa | 28S/5.8S |
| 4V8P        | F1E2  | <i>Tetrahymena thermophila</i>       | Protozoa | 26S/5.8S |
| 5XY3        | 14    | <i>Trichomonas vaginalis</i>         | Protozoa | 25S/5.8S |
| 4V7H        | B5B4  | <i>Thermomyces lanuginosus</i>       | Fungi    | 26S/5.8S |
| 4V91        | 14    | <i>Kluyveromyces lactis</i>          | Yeast    | 25S/5.8S |
| 4V88        | A5A8  | <i>Saccharomyces cerevisiae</i>      | Yeast    | 25S/5.8S |
| 4V7E        | AaAc  | <i>Triticum aestivum</i>             | Plant    | 25S/5.8S |
| 4V6W        | A5A8  | <i>Drosophila melanogaster</i>       | Fly      | 28S/5.8S |
| 4V6X        | A5A8  | <i>Homo sapiens</i>                  | Mammal   | 28S/5.8S |
| 5LZS        | 58    | <i>Oryctolagus cuniculus</i>         | Mammal   | 28S/5.8S |
| 3J7P        | 58    | <i>Sus scrofa</i>                    | Mammal   | 28S/5.8S |

Table S7: Occurrences of non-separable dual graph blocks between 2-9 vertices in 660 of the 863 RNA 2D structure files without rRNA residues

| Subgraph ID | Occurrences | Subgraph ID | Occurrences |
|-------------|-------------|-------------|-------------|
| 2_2         | 636         | 4_19        | 125         |
| 2_1         | 107         | 3_5         | 84          |
| 2_3         | 39          | 4_27        | 17          |
| 5_2         | 16          | 3_6         | 14          |
| 3_8         | 11          | 4_25        | 7           |
| 5_49        | 7           | 6_369       | 5           |
| 5_25        | 2           | 5_5         | 2           |
| 5_52        | 2           | 7_1341      | 2           |
| 7_729       | 2           | 9_38601     | 2           |
| 4_20        | 1           | 4_21        | 1           |
| 4_22        | 1           | 4_30        | 1           |
| 5_14        | 1           | 5_35        | 1           |
| 5_46        | 1           | 5_68        | 1           |
| 5_94        | 1           | 6_190       | 1           |
| 6_267       | 1           | 6_28        | 1           |
| 6_281       | 1           | 6_36        | 1           |
| 7_1219      | 1           | 7_1329      | 1           |
| 7_2329      | 1           | 7_747       | 1           |
| 8_9902      | 1           | 9_23267     | 1           |
| 9_38602     | 1           | 9_38603     | 1           |
